# Supplementary material
Source: publisher site journal article supplement (https://www.dovepress.com/article/447934)
Supplement: Supplementary file 1 [file get_supplementary_file.php]

| EVPL-F: TGGAGGACTACCGCCGGTTCC |
| --- |
| EVPL-R: CGGTGACGGCCAGCCGTTTT |
| GAPDH-F: ACCCAGAAGACTGTGGATGG |
| GAPDH-R: CACATTGGGGGTAGGAACAC |

Supplementary Table 1
